# Supplementary material for: A prediction model for lymph node metastases using pathologic features in patients intraoperatively diagnosed as stage I non-small cell lung cancer
Source: BMC Cancer. 2017 Apr 13;17:267. doi: 10.1186/s12885-017-3273-x (PMC5390383; doi:10.1186/s12885-017-3273-x)
Supplement: Additional file 1: — Support file containing the Age ranges, Pathology, location, Differentiation, Tumor size 2.65 cm, Pleura invasion, Bronchus invasion, Multicentric invasion, Angiolymphatic invasion, Neural invasion and LNM (lymph node metastasis) described in categorical variables and Tumorsize, xβ and ŷ described in continuous variables. (XLSX 32 kb) [file 12885_2017_3273_MOESM1_ESM.xlsx]

## Sheet: Sheet1
ID	age ranges(0≤60,1:＞60)	pathology（0:S,1:A）	location(0RU,1RM,2RL,3LU,4LL,5MIX)	location(0R,1L)	location(0U,1M+L)	location(0:Single,1:MIX)	Differentiation (0:Ⅰ,1:Ⅱ,2:Ⅲ)	Differentiation (0:Ⅰ,1:Ⅱ+Ⅲ)	Tumorsize	Tumorsize2.65cm	Pleura invasion (0:absent,1:present)	Bronchus invasion (0:absent,1:present)	Multicentric invasion (0:absent,1:present)	Angiolymphatic invasion (0:absent,1:present)	Neural invasion (0:absent,1:present)	LNM (0:negative,1:positive)	xβ	ŷ
1	0	1	4	1	1	0	1	1	1.5	0	0	1	0	0	0	0	1.9493	0.87537
2	1	1	4	1	1	0	1	1	3.5	1	0	0	0	0	0	1	2.2613	0.905621
3	1	1	4	1	1	0	2	1	3.2	1	1	0	0	0	0	1	2.2613	0.905621
4	1	1	3	1	0	0	1	1	2	0	0	0	0	0	0	0	1.0733	0.745224
5	0	1	3	1	0	0	1	1	2	0	1	0	0	0	0	0	1.0733	0.745224
6	1	1	4	1	1	0	1	1	2.5	0	0	0	0	0	0	0	1.0733	0.745224
7	1	1	0	0	0	0	1	1	1.5	0	0	0	0	0	0	0	1.0733	0.745224
8	1	1	0	0	0	0	0	0	1.5	0	0	0	0	0	0	0	-0.2947	0.426854
9	1	1	4	1	1	0	0	0	1.5	0	0	0	0	0	0	0	-0.2947	0.426854
10	0	1	0	0	0	0	1	1	4	1	1	0	0	0	0	0	2.2613	0.905621
11	0	0	2	0	1	0	2	1	2	0	0	0	0	0	0	0	1.0733	0.745224
12	0	1	3	1	0	0	1	1	2.5	0	0	0	0	0	0	1	1.0733	0.745224
13	1	1	3	1	0	0	1	1	3.5	1	0	0	0	0	0	0	2.2613	0.905621
14	1	1	4	1	1	0	1	1	2	0	0	1	0	0	0	1	1.9493	0.87537
15	1	1	4	1	1	0	1	1	2	0	0	0	0	0	0	0	1.0733	0.745224
16	1	1	3	1	0	0	1	1	1	0	0	0	0	0	0	0	1.0733	0.745224
17	0	1	0	0	0	0	1	1	3	1	0	0	0	0	0	1	2.2613	0.905621
18	1	1	0	0	0	0	0	0	0.8	0	0	0	0	0	0	0	-0.2947	0.426854
19	0	1	4	1	1	0	0	0	0.8	0	0	0	0	0	0	0	-0.2947	0.426854
20	1	1	3	1	0	0	0	0	3.2	1	0	0	0	0	0	0	0.8933	0.709571
21	1	0	4	1	1	0	0	0	4	1	0	0	0	0	0	0	0.8933	0.709571
22	1	0	2	0	1	0	1	1	3	1	0	0	0	0	0	1	2.2613	0.905621
23	0	1	1	0	1	0	1	1	2	0	1	0	0	0	0	0	1.0733	0.745224
24	1	1	4	1	1	0	1	1	2.5	0	0	1	0	0	0	0	1.9493	0.87537
25	1	1	0	0	0	0	1	1	2.5	0	1	0	0	0	0	0	1.0733	0.745224
26	1	1	0	0	0	0	0	0	1.6	0	0	0	0	0	0	0	-0.2947	0.426854
27	0	1	1	0	1	0	1	1	3	1	0	0	0	0	0	0	2.2613	0.905621
28	1	1	3	1	0	0	1	1	3	1	0	0	0	0	0	0	2.2613	0.905621
29	1	1	0	0	0	0	0	0	2	0	0	0	0	0	0	0	-0.2947	0.426854
30	1	1	0	0	0	0	1	1	2.5	0	1	0	0	0	0	0	1.0733	0.745224
31	0	1	4	1	1	0	1	1	4	1	0	0	0	0	0	0	2.2613	0.905621
32	1	1	3	1	0	0	1	1	3	1	1	0	0	0	0	1	2.2613	0.905621
33	0	1	0	0	0	0	1	1	2	0	0	0	0	0	0	1	1.0733	0.745224
34	0	1	5			1	1	1	2	0	0	0	1	0	0	0	1.0733	0.745224
35	1	1	1	0	1	0	0	0	2.2	0	1	0	0	0	0	0	-0.2947	0.426854
36	0	1	3	1	0	0	0	0	0.8	0	0	0	0	0	0	0	-0.2947	0.426854
37	0	1	4	1	1	0	1	1	2.5	0	0	0	0	0	0	0	1.0733	0.745224
38	0	1	3	1	0	0	0	0	2	0	1	0	0	0	0	0	-0.2947	0.426854
39	0	1	3	1	0	0	0	0	2.5	0	0	0	0	0	0	1	-0.2947	0.426854
40	0	1	2	0	1	0	1	1	1.8	0	0	0	0	0	0	0	1.0733	0.745224
41	1	1	0	0	0	0	1	1	3	1	1	0	0	0	0	1	2.2613	0.905621
42	0	1	0	0	0	0	1	1	2	0	1	0	0	0	0	1	1.0733	0.745224
43	0	1	3	1	0	0	1	1	4	1	0	1	0	0	0	0	3.1373	0.958405
44	0	1	0	0	0	0	2	1	4	1	0	1	0	0	0	0	3.1373	0.958405
45	1	1	4	1	1	0	1	1	0.8	0	0	0	0	0	0	0	1.0733	0.745224
46	1	1	3	1	0	0	0	0	2	0	0	0	0	0	0	0	-0.2947	0.426854
47	0	1	2	0	1	0	1	1	4	1	0	0	0	0	0	0	2.2613	0.905621
48	1	1	0	0	0	0	0	0	2	0	1	0	0	0	0	0	-0.2947	0.426854
49	0	0	0	0	0	0	0	0	4	1	0	1	0	1	0	1	1.7693	0.854371
50	1	1	0	0	0	0	1	1	2.5	0	0	0	0	0	0	0	1.0733	0.745224
51	0	1	3	1	0	0	0	0	2.5	0	0	0	0	0	0	0	-0.2947	0.426854
52	1	0	4	1	1	0	2	1	4	1	0	0	0	0	0	0	2.2613	0.905621
53	0	1	2	0	1	0	0	0	0.8	0	0	0	0	0	0	0	-0.2947	0.426854
54	1	0	4	1	1	0	1	1	3	1	0	1	0	0	0	1	3.1373	0.958405
55	1	0	0	0	0	0	1	1	4	1	0	1	0	0	0	1	3.1373	0.958405
56	0	1	2	0	1	0	1	1	3	1	0	0	0	0	0	0	2.2613	0.905621
57	1	0	2	0	1	0	1	1	1.5	0	0	1	0	0	0	1	1.9493	0.87537
58	1	1	0	0	0	0	2	1	3.5	1	0	0	0	0	0	0	2.2613	0.905621
59	0	1	2	0	1	0	0	0	2	0	0	0	0	0	0	0	-0.2947	0.426854
60	0	0	4	1	1	0	1	1	4	1	0	1	0	0	0	0	3.1373	0.958405
61	0	1	2	0	1	0	1	1	4	1	1	1	0	0	0	1	3.1373	0.958405
62	1	1	2	0	1	0	0	0	2.5	0	1	0	0	0	0	0	-0.2947	0.426854
63	1	1	4	1	1	0	2	1	2.5	0	0	0	0	0	0	0	1.0733	0.745224
64	0	1	2	0	1	0	1	1	2.5	0	1	1	0	1	0	0	1.9493	0.87537
65	0	1	0	0	0	0	0	0	3.1	1	0	0	0	0	0	0	0.8933	0.709571
66	1	1	0	0	0	0	0	0	2.5	0	0	0	0	0	0	0	-0.2947	0.426854
67	1	1	2	0	1	0	2	1	3	1	1	0	0	0	0	0	2.2613	0.905621
68	0	1	3	1	0	0	0	0	0.7	0	0	0	0	0	0	0	-0.2947	0.426854
69	1	1	3	1	0	0	1	1	4	1	1	0	0	0	0	0	2.2613	0.905621
70	1	0	4	1	1	0	1	1	4	1	0	0	0	0	0	0	2.2613	0.905621
71	1	1	0	0	0	0	1	1	4	1	0	0	0	0	0	1	2.2613	0.905621
72	1	1	0	0	0	0	1	1	4	1	1	0	0	0	0	0	2.2613	0.905621
73	1	0	3	1	0	0	1	1	2	0	0	1	0	0	0	0	1.9493	0.87537
74	0	0	4	1	1	0	2	1	4	1	0	0	1	0	0	1	2.2613	0.905621
75	1	1	5			1	0	0	1.5	0	0	0	1	0	0	0	-0.2947	0.426854
76	0	1	4	1	1	0	1	1	2.5	0	1	0	0	0	0	1	1.0733	0.745224
77	1	1	3	1	0	0	1	1	2	0	0	0	0	0	0	0	1.0733	0.745224
78	0	1	1	0	1	0	0	0	0.7	0	0	0	0	0	0	0	-0.2947	0.426854
79	0	1	5			1	1	1	3	1	0	0	1	0	0	1	2.2613	0.905621
80	0	1	0	0	0	0	0	0	1.5	0	0	0	0	0	0	0	-0.2947	0.426854
81	0	1	0	0	0	0	0	0	1.5	0	0	0	0	0	0	0	-0.2947	0.426854
82	0	1	0	0	0	0	0	0	3.2	1	0	0	0	0	0	0	0.8933	0.709571
83	1	1	3	1	0	0	2	1	2	0	0	0	0	0	0	0	1.0733	0.745224
84	0	1	0	0	0	0	1	1	1.2	0	0	0	0	0	0	0	1.0733	0.745224
85	0	1	2	0	1	0	0	0	1.3	0	0	0	0	0	0	0	-0.2947	0.426854
86	0	1	2	0	1	0	1	1	1.5	0	1	0	0	0	0	0	1.0733	0.745224
87	0	1	0	0	0	0	0	0	1.1	0	0	0	0	0	0	0	-0.2947	0.426854
88	0	1	4	1	1	0	0	0	3	1	0	0	0	0	0	0	0.8933	0.709571
89	0	1	2	0	1	0	1	1	3	1	0	0	0	0	0	0	2.2613	0.905621
90	0	1	2	0	1	0	1	1	3.5	1	0	0	0	1	0	1	2.2613	0.905621
91	0	1	2	0	1	0	1	1	2	0	1	0	0	0	0	0	1.0733	0.745224
92	1	1	0	0	0	0	0	0	1	0	0	0	0	0	0	0	-0.2947	0.426854
93	0	1	3	1	0	0	0	0	0.4	0	0	0	0	0	0	0	-0.2947	0.426854
94	1	0	3	1	0	0	1	1	4	1	1	0	0	0	0	0	2.2613	0.905621
95	0	1	3	1	0	0	0	0	1	0	0	0	0	0	0	0	-0.2947	0.426854
96	0	1	4	1	1	0	0	0	1.5	0	0	0	0	0	0	0	-0.2947	0.426854
97	0	0	4	1	1	0	1	1	3	1	0	0	0	1	0	1	2.2613	0.905621
98	1	0	3	1	0	0	2	1	3.5	1	0	0	0	0	0	0	2.2613	0.905621
99	0	1	3	1	0	0	0	0	1	0	0	0	0	0	0	0	-0.2947	0.426854
100	0	1	3	1	0	0	1	1	1.8	0	0	0	0	0	0	0	1.0733	0.745224
101	0	1	1	0	1	0	1	1	3	1	0	1	0	0	0	0	3.1373	0.958405
102	0	1	4	1	1	0	1	1	3	1	1	0	0	0	0	0	2.2613	0.905621
103	0	1	1	0	1	0	1	1	3	1	0	0	0	0	0	0	2.2613	0.905621
104	1	1	3	1	0	0	1	1	2.6	0	0	0	0	0	0	0	1.0733	0.745224
105	0	1	0	0	0	0	1	1	3.5	1	0	1	0	0	0	1	3.1373	0.958405
106	0	1	3	1	0	0	1	1	2.5	0	0	0	0	0	0	0	1.0733	0.745224
107	0	1	3	1	0	0	1	1	2.6	0	0	0	0	0	0	0	1.0733	0.745224
108	1	1	0	0	0	0	0	0	0.5	0	0	0	0	0	0	0	-0.2947	0.426854
109	1	0	3	1	0	0	0	0	1	0	0	1	0	0	0	1	0.5813	0.641366
110	1	1	4	1	1	0	0	0	2	0	0	0	0	0	0	0	-0.2947	0.426854
111	1	1	5			1	0	0	2	0	1	0	1	0	0	0	-0.2947	0.426854
112	0	1	2	0	1	0	1	1	2.5	0	0	0	0	0	0	0	1.0733	0.745224
113	1	1	3	1	0	0	0	0	4	1	1	0	0	0	0	0	0.8933	0.709571
114	0	1	4	1	1	0	1	1	2	0	1	0	0	0	0	0	1.0733	0.745224
115	1	1	3	1	0	0	0	0	1.5	0	1	0	0	0	0	0	-0.2947	0.426854
116	1	1	5			1	1	1	2.2	0	1	0	1	0	0	0	1.0733	0.745224
117	1	1	0	0	0	0	1	1	1.4	0	1	0	0	0	0	0	1.0733	0.745224
118	1	1	5			1	1	1	1	0	0	0	1	0	0	0	1.0733	0.745224
119	1	1	0	0	0	0	0	0	2.2	0	1	0	0	0	0	0	-0.2947	0.426854
120	1	1	0	0	0	0	0	0	2	0	0	0	0	0	0	0	-0.2947	0.426854
121	1	1	3	1	0	0	0	0	0.9	0	0	0	0	0	0	0	-0.2947	0.426854
122	0	1	2	0	1	0	1	1	2	0	0	0	0	0	0	1	1.0733	0.745224
123	1	1	3	1	0	0	1	1	4	1	0	0	0	0	0	0	2.2613	0.905621
124	0	1	3	1	0	0	1	1	2	0	0	0	0	0	0	0	1.0733	0.745224
125	0	0	0	0	0	0	1	1	3.5	1	0	0	0	0	0	0	2.2613	0.905621
126	1	1	2	0	1	0	1	1	2	0	0	0	0	0	0	1	1.0733	0.745224
127	1	1	1	0	1	0	1	1	3	1	0	0	0	0	0	0	2.2613	0.905621
128	1	1	2	0	1	0	1	1	1.5	0	0	0	0	0	0	0	1.0733	0.745224
129	1	0	3	1	0	0	2	1	3.5	1	0	0	0	0	0	0	2.2613	0.905621
130	1	1	2	0	1	0	1	1	1.8	0	0	0	0	0	0	0	1.0733	0.745224
131	0	0	0	0	0	0	1	1	4	1	0	0	0	0	0	1	2.2613	0.905621
132	0	1	4	1	1	0	2	1	2.5	0	0	0	0	0	0	1	1.0733	0.745224
133	0	1	3	1	0	0	1	1	4	1	1	1	0	0	0	1	3.1373	0.958405
134	1	0	3	1	0	0	1	1	2	0	0	1	0	0	0	0	1.9493	0.87537
135	1	1	5			1	1	1	2.5	0	1	0	1	0	0	1	1.0733	0.745224
136	0	1	3	1	0	0	1	1	3	1	0	0	0	0	0	1	2.2613	0.905621
137	0	1	5			1	2	1	2.5	0	0	0	0	0	0	0	1.0733	0.745224
138	0	1	4	1	1	0	1	1	2.8	1	1	0	0	0	0	1	2.2613	0.905621
139	0	1	4	1	1	0	1	1	3.5	1	1	0	0	0	0	1	2.2613	0.905621
140	0	1	1	0	1	0	0	0	1.5	0	0	0	0	0	0	0	-0.2947	0.426854
141	1	1	0	0	0	0	2	1	3.5	1	1	0	0	0	0	1	2.2613	0.905621
142	1	1	1	0	1	0	1	1	4	1	0	0	0	0	0	1	2.2613	0.905621
143	1	1	3	1	0	0	0	0	2	0	0	0	0	0	0	0	-0.2947	0.426854
144	1	1	4	1	1	0	1	1	3.5	1	1	1	0	1	0	0	3.1373	0.958405
145	0	1	3	1	0	0	1	1	1.2	0	0	0	0	0	0	0	1.0733	0.745224
146	0	1	1	0	1	0	1	1	2.5	0	0	0	0	0	0	0	1.0733	0.745224
147	1	1	0	0	0	0	0	0	1.5	0	0	0	0	0	0	0	-0.2947	0.426854
148	0	1	4	1	1	0	1	1	4	1	0	0	0	0	0	1	2.2613	0.905621
149	0	1	0	0	0	0	1	1	2.5	0	0	0	1	0	0	0	1.0733	0.745224
150	0	1	0	0	0	0	1	1	1.5	0	0	0	0	0	0	0	1.0733	0.745224
151	1	0	5			1	1	1	2.5	0	0	1	0	0	1	0	1.9493	0.87537
152	1	1	4	1	1	0	1	1	2.8	1	0	0	0	0	0	1	2.2613	0.905621
153	1	1	4	1	1	0	1	1	3	1	1	0	0	0	0	0	2.2613	0.905621
154	1	1	4	1	1	0	0	0	1	0	0	0	0	0	0	0	-0.2947	0.426854
155	1	1	0	0	0	0	1	1	1.5	0	0	0	0	0	0	1	1.0733	0.745224
156	1	0	0	0	0	0	2	1	3.8	1	0	1	0	0	0	0	3.1373	0.958405
157	0	1	4	1	1	0	1	1	1.5	0	0	0	0	0	0	0	1.0733	0.745224
158	1	1	3	1	0	0	0	0	1.2	0	0	0	0	0	0	0	-0.2947	0.426854
159	0	1	0	0	0	0	0	0	1	0	0	0	0	0	0	0	-0.2947	0.426854
160	0	1	4	1	1	0	1	1	2.6	0	0	0	0	0	0	0	1.0733	0.745224
161	0	1	0	0	0	0	0	0	1	0	0	0	0	0	0	0	-0.2947	0.426854
162	0	1	0	0	0	0	1	1	2.5	0	0	0	0	0	0	0	1.0733	0.745224
163	1	1	0	0	0	0	1	1	3	1	1	0	0	0	0	1	2.2613	0.905621
164	1	1	3	1	0	0	0	0	2	0	0	0	0	0	0	0	-0.2947	0.426854
165	0	1	2	0	1	0	1	1	3.5	1	1	0	0	0	0	1	2.2613	0.905621
166	1	0	0	0	0	0	1	1	4	1	0	0	0	0	0	0	2.2613	0.905621
167	0	1	1	0	1	0	1	1	2	0	0	0	0	0	0	0	1.0733	0.745224
168	1	1	0	0	0	0	0	0	0.6	0	0	0	0	0	0	0	-0.2947	0.426854
169	0	1	4	1	1	0	1	1	3.5	1	0	0	0	0	0	1	2.2613	0.905621
170	0	1	3	1	0	0	2	1	4	1	0	0	0	1	0	1	2.2613	0.905621
171	1	1	1	0	1	0	0	0	1	0	0	0	0	0	0	0	-0.2947	0.426854
172	1	1	0	0	0	0	1	1	3.5	1	1	1	0	0	0	1	3.1373	0.958405
173	0	1	3	1	0	0	1	1	2	0	0	0	0	0	0	0	1.0733	0.745224
174	1	1	4	1	1	0	1	1	2.5	0	1	0	0	0	0	0	1.0733	0.745224
175	1	1	3	1	0	0	2	1	2.5	0	0	0	0	0	0	0	1.0733	0.745224
176	1	1	3	1	0	0	0	0	2.5	0	0	0	0	0	0	0	-0.2947	0.426854
177	0	0	3	1	0	0	1	1	3	1	0	0	0	0	0	0	2.2613	0.905621
178	0	1	4	1	1	0	1	1	2.2	0	0	0	0	1	0	0	1.0733	0.745224
179	1	0	2	0	1	0	1	1	3	1	1	0	0	0	0	0	2.2613	0.905621
180	1	1	0	0	0	0	1	1	2.5	0	0	0	0	0	0	0	1.0733	0.745224
181	0	1	3	1	0	0	1	1	3	1	0	0	0	0	0	0	2.2613	0.905621
182	1	1	0	0	0	0	1	1	2.7	1	0	0	0	0	0	1	2.2613	0.905621
183	0	1	0	0	0	0	0	0	3	1	0	0	0	0	0	0	0.8933	0.709571
184	1	1	2	0	1	0	1	1	2	0	0	0	0	1	0	0	1.0733	0.745224
185	0	1	5			1	0	0	2.3	0	0	0	1	0	0	0	-0.2947	0.426854
186	1	1	4	1	1	0	1	1	1.8	0	0	0	0	0	0	0	1.0733	0.745224
187	0	1	3	1	0	0	1	1	2.8	1	0	0	0	0	0	0	2.2613	0.905621
188	1	1	0	0	0	0	1	1	3	1	1	0	0	0	0	0	2.2613	0.905621
189	1	1	2	0	1	0	1	1	3	1	0	0	0	0	0	1	2.2613	0.905621
190	1	1	3	1	0	0	1	1	2	0	1	0	0	0	0	0	1.0733	0.745224
191	0	1	0	0	0	0	0	0	2	0	0	0	0	0	0	0	-0.2947	0.426854
192	1	0	3	1	0	0	1	1	1	0	0	0	0	0	0	1	1.0733	0.745224
193	1	1	3	1	0	0	0	0	1.2	0	0	0	0	0	0	0	-0.2947	0.426854
194	0	1	0	0	0	0	0	0	1.5	0	0	0	0	0	0	0	-0.2947	0.426854
195	1	1	0	0	0	0	0	0	2.5	0	0	0	0	0	0	0	-0.2947	0.426854
196	1	1	4	1	1	0	1	1	3	1	0	1	0	0	0	1	3.1373	0.958405
197	1	0	5			1	1	1	4	1	0	0	0	0	0	1	2.2613	0.905621
198	1	1	2	0	1	0	0	0	2.2	0	1	0	1	0	0	0	-0.2947	0.426854
199	1	1	0	0	0	0	1	1	4	1	0	0	0	0	0	0	2.2613	0.905621
200	0	1	2	0	1	0	0	0	2.5	0	0	0	0	0	0	0	-0.2947	0.426854
201	0	1	2	0	1	0	0	0	2.5	0	0	0	0	0	0	1	-0.2947	0.426854
202	1	1	1	0	1	0	0	0	0.6	0	0	0	1	0	0	0	-0.2947	0.426854
203	0	1	3	1	0	0	1	1	2	0	0	0	0	0	0	0	1.0733	0.745224
204	0	1	3	1	0	0	0	0	1.8	0	0	0	0	0	0	0	-0.2947	0.426854
205	1	1	3	1	0	0	1	1	3	1	1	0	0	0	0	0	2.2613	0.905621
206	0	1	0	0	0	0	1	1	1.3	0	0	0	0	0	0	1	1.0733	0.745224
207	1	1	3	1	0	0	2	1	2	0	0	0	0	0	0	0	1.0733	0.745224
208	1	1	5			1	1	1	2	0	1	0	1	0	0	1	1.0733	0.745224
209	1	1	3	1	0	0	1	1	2	0	1	0	0	0	0	0	1.0733	0.745224
210	0	1	0	0	0	0	1	1	2	0	1	0	0	0	0	0	1.0733	0.745224
211	1	0	3	1	0	0	1	1	4	1	0	1	0	0	0	0	3.1373	0.958405
212	0	1	3	1	0	0	1	1	3.5	1	0	0	0	0	0	1	2.2613	0.905621
213	1	1	0	0	0	0	1	1	2	0	0	0	0	0	0	0	1.0733	0.745224
214	0	1	3	1	0	0	0	0	1.2	0	0	0	0	0	0	0	-0.2947	0.426854
215	1	1	4	1	1	0	1	1	1.5	0	0	0	0	0	0	0	1.0733	0.745224
216	1	1	5			1	1	1	1.5	0	0	0	1	0	0	0	1.0733	0.745224
217	1	1	0	0	0	0	0	0	2.7	1	0	0	0	0	0	1	0.8933	0.709571
218	1	0	3	1	0	0	1	1	4	1	0	1	0	0	0	0	3.1373	0.958405
219	1	1	5			1	1	1	2	0	0	0	1	1	0	0	1.0733	0.745224
220	1	0	3	1	0	0	1	1	3	1	0	0	0	0	0	0	2.2613	0.905621
221	0	1	4	1	1	0	1	1	4	1	1	0	0	0	0	1	2.2613	0.905621
222	0	1	0	0	0	0	0	0	4	1	0	0	0	0	0	0	0.8933	0.709571
223	0	1	2	0	1	0	1	1	2	0	0	0	0	0	0	1	1.0733	0.745224
224	0	1	3	1	0	0	1	1	3	1	0	1	0	0	0	1	3.1373	0.958405
225	0	1	3	1	0	0	1	1	1.5	0	1	0	0	0	0	0	1.0733	0.745224
226	0	1	0	0	0	0	0	0	1.5	0	0	0	0	0	0	0	-0.2947	0.426854
227	0	1	0	0	0	0	1	1	2.5	0	0	1	0	0	0	0	1.9493	0.87537
228	1	1	0	0	0	0	1	1	1.5	0	0	0	0	0	0	0	1.0733	0.745224
229	1	1	2	0	1	0	1	1	3	1	0	0	0	0	0	0	2.2613	0.905621
230	1	1	0	0	0	0	1	1	3	1	0	0	0	0	0	0	2.2613	0.905621
231	0	1	0	0	0	0	1	1	2	0	0	0	0	0	0	0	1.0733	0.745224
232	0	1	5			1	1	1	2.5	0	0	0	1	0	0	0	1.0733	0.745224
233	0	1	0	0	0	0	1	1	1.5	0	0	0	0	0	0	0	1.0733	0.745224
234	0	1	4	1	1	0	1	1	4	1	0	0	0	0	0	0	2.2613	0.905621
235	0	1	4	1	1	0	0	0	1.5	0	0	0	0	0	0	0	-0.2947	0.426854
236	1	1	5			1	1	1	3.5	1	1	0	0	0	0	1	2.2613	0.905621
237	1	0	0	0	0	0	1	1	1.5	0	0	0	0	0	0	0	1.0733	0.745224
238	0	1	2	0	1	0	1	1	1.6	0	0	0	0	0	0	0	1.0733	0.745224
239	1	1	3	1	0	0	1	1	4	1	1	0	0	0	0	0	2.2613	0.905621
240	0	1	5			1	1	1	3	1	0	0	0	0	0	0	2.2613	0.905621
241	0	1	2	0	1	0	0	0	0.5	0	0	0	0	0	0	0	-0.2947	0.426854
242	1	1	3	1	0	0	0	0	1.8	0	0	0	0	0	0	0	-0.2947	0.426854
243	0	1	0	0	0	0	1	1	4	1	0	1	0	0	0	1	3.1373	0.958405
244	0	1	2	0	1	0	1	1	2	0	0	0	0	0	0	1	1.0733	0.745224
245	1	0	4	1	1	0	2	1	3.5	1	0	1	0	1	0	0	3.1373	0.958405
246	0	1	0	0	0	0	1	1	4	1	0	1	0	0	0	0	3.1373	0.958405
247	1	1	2	0	1	0	0	0	2.5	0	0	0	0	0	0	0	-0.2947	0.426854
248	1	1	1	0	1	0	1	1	3	1	0	0	0	0	0	0	2.2613	0.905621
249	0	1	3	1	0	0	1	1	3	1	0	0	0	0	0	1	2.2613	0.905621
250	0	1	3	1	0	0	1	1	3	1	0	0	0	0	0	0	2.2613	0.905621
251	0	1	4	1	1	0	2	1	4	1	1	0	0	0	0	1	2.2613	0.905621
252	0	1	3	1	0	0	1	1	1.3	0	1	0	0	0	0	1	1.0733	0.745224
253	0	1	3	1	0	0	0	0	1	0	0	0	0	0	0	0	-0.2947	0.426854
254	1	1	3	1	0	0	1	1	3.5	1	1	0	0	0	0	1	2.2613	0.905621
255	1	1	3	1	0	0	1	1	2.8	1	0	0	0	0	0	0	2.2613	0.905621
256	0	1	2	0	1	0	0	0	4	1	0	0	0	0	0	0	0.8933	0.709571
257	1	1	1	0	1	0	1	1	3.5	1	0	1	0	0	0	1	3.1373	0.958405
258	1	1	3	1	0	0	1	1	1	0	0	0	0	0	0	0	1.0733	0.745224
259	0	1	0	0	0	0	1	1	1.8	0	1	1	1	0	0	1	1.9493	0.87537
260	1	1	3	1	0	0	1	1	4	1	1	1	0	0	0	1	3.1373	0.958405
261	0	1	3	1	0	0	0	0	1.6	0	0	0	0	0	0	0	-0.2947	0.426854
262	0	1	5			1	1	1	2.5	0	1	0	1	0	0	0	1.0733	0.745224
263	0	1	0	0	0	0	0	0	3	1	0	0	0	0	0	0	0.8933	0.709571
264	1	1	2	0	1	0	1	1	3	1	0	0	0	0	0	0	2.2613	0.905621
265	1	0	0	0	0	0	1	1	2	0	1	0	0	0	0	0	1.0733	0.745224
266	1	0	0	0	0	0	0	0	3	1	0	1	0	0	0	1	1.7693	0.854371
267	0	1	0	0	0	0	1	1	2	0	1	0	0	0	0	0	1.0733	0.745224
268	0	1	4	1	1	0	1	1	1.2	0	0	0	0	0	0	1	1.0733	0.745224
269	1	1	0	0	0	0	2	1	1.6	0	0	0	0	0	0	0	1.0733	0.745224
270	1	1	0	0	0	0	1	1	2	0	0	1	0	0	0	1	1.9493	0.87537
271	1	1	2	0	1	0	1	1	4	1	0	0	1	0	0	0	2.2613	0.905621
272	0	1	1	0	1	0	0	0	0.6	0	0	0	0	0	0	0	-0.2947	0.426854
273	1	1	4	1	1	0	1	1	3	1	1	0	0	0	0	0	2.2613	0.905621
274	1	1	0	0	0	0	0	0	2	0	0	0	0	0	0	0	-0.2947	0.426854
275	0	1	3	1	0	0	0	0	2	0	0	0	0	0	0	0	-0.2947	0.426854
276	1	0	0	0	0	0	1	1	2.5	0	0	1	0	0	0	0	1.9493	0.87537
277	0	1	0	0	0	0	1	1	2	0	0	0	0	0	0	0	1.0733	0.745224
278	1	1	4	1	1	0	0	0	2.2	0	1	0	0	0	0	0	-0.2947	0.426854
279	1	1	4	1	1	0	0	0	4	1	0	0	0	0	0	0	0.8933	0.709571
280	0	1	2	0	1	0	1	1	1	0	0	0	0	0	0	0	1.0733	0.745224
281	1	0	0	0	0	0	2	1	2	0	0	1	0	0	0	0	1.9493	0.87537
282	1	1	0	0	0	0	0	0	1	0	0	0	0	0	0	0	-0.2947	0.426854
283	0	1	5			1	0	0	2	0	1	0	1	0	0	0	-0.2947	0.426854
284	1	1	3	1	0	0	1	1	3.5	1	0	0	0	0	0	0	2.2613	0.905621
